# Supplementary material for: HOXD3 targeted by miR-203a suppresses cell metastasis and angiogenesis through VEGFR in human hepatocellular carcinoma cells
Source: Sci Rep. 2018 Feb 5;8:2431. doi: 10.1038/s41598-018-20859-3 (PMC5799159; doi:10.1038/s41598-018-20859-3)

# HOXD3 targeted by miR-203a suppresses cell metastasis and angiogenesis through the VEGFR in human hepatocellular carcinoma cells

Lumin Wang<sup>1</sup>, Dongdong Tong<sup>1</sup>, Qingqing Guo<sup>2</sup>, Xiaofei Wang<sup>2</sup>, Fei Wu<sup>1</sup>, Qian Li<sup>1</sup>, Juan Yang<sup>1</sup>, Lingyu Zhao<sup>1</sup>, Yannan Qing<sup>1</sup> and Yingxun Liu<sup>1</sup> and Chen Huang<sup>1,2,3\*</sup>.

## Supplementary Information

**Supplementary Figure 1. The expression of miR-203a was reduced in clinical sepecimens.** The average expression level of miR-203a in HCC (n=10) and normal tissues (n=10). The expression of miR-203a was normalized to U6 RNA.

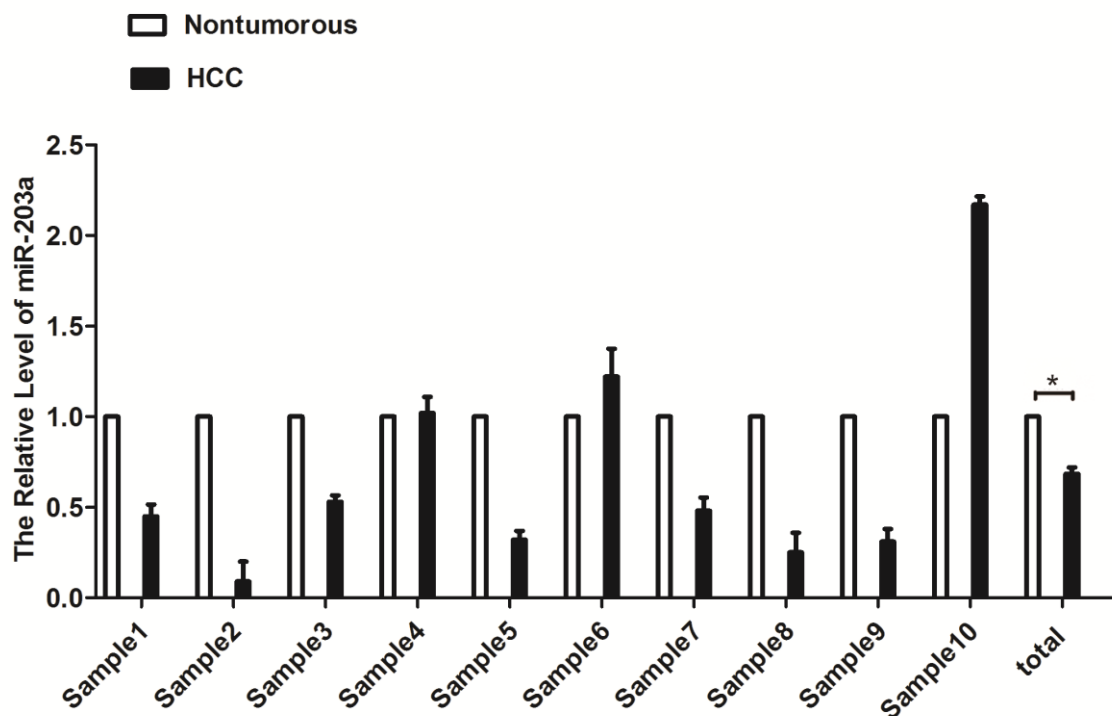

**Supplementary Figure 2. The relationship between miR-203a and survival rates.**

(A) The relationship between the expression of miR-203a and overall survival. (B) the relationship between the expression levels of miR-203a and disease free survival.

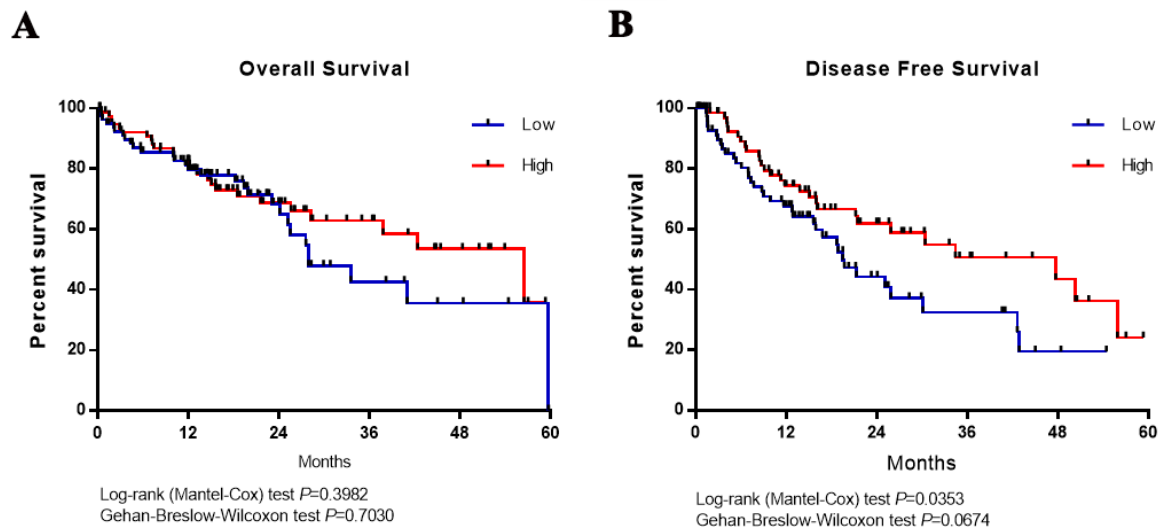

**Supplementary Figure 3. VEGFR related signal transduction pathway.** (A) and (B) The assay of bioinformatics showed that HOXD3, VEGFR, AKT, ERK, BCL2, BAX, EGFR, E-Cadherin, N-Cadherin, CCNB1, CDK1 were involved in one signaling network.

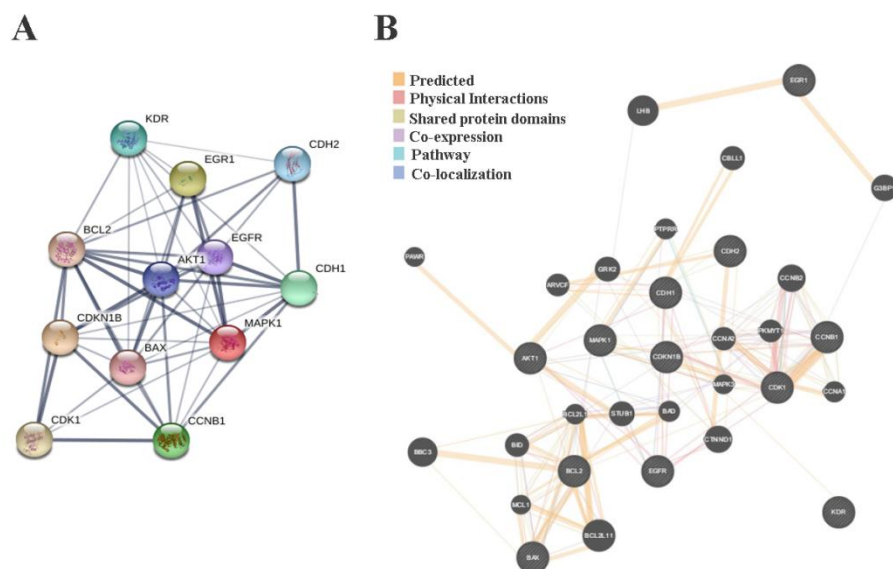

Supplement: Supplementary file 1 — Supplementary information [file 41598_2018_20859_MOESM1_ESM.pdf]
